# Supplementary material for: Cloning and Characterization of a Flavonoid 3′-Hydroxylase Gene from Tea Plant (Camellia sinensis)
Source: PubMed Central journal article supplement (PMC4783990; doi:10.3390/ijms17020261), 2016-02-22
Supplement: ijms-17-00261-s001.pdf [file ijms-17-00261-s001.pdf]

## Supplementary Materials: Cloning and Characterization of a Flavonoid 3'-Hydroxylase Gene from Tea Plant (*Camellia sinensis*)

Tian-Shan Zhou, Rui Zhou, You-Ben Yu, Yao Xiao, Dong-Hua Li, Bin Xiao, Oliver Yu and Ya-Jun Yang

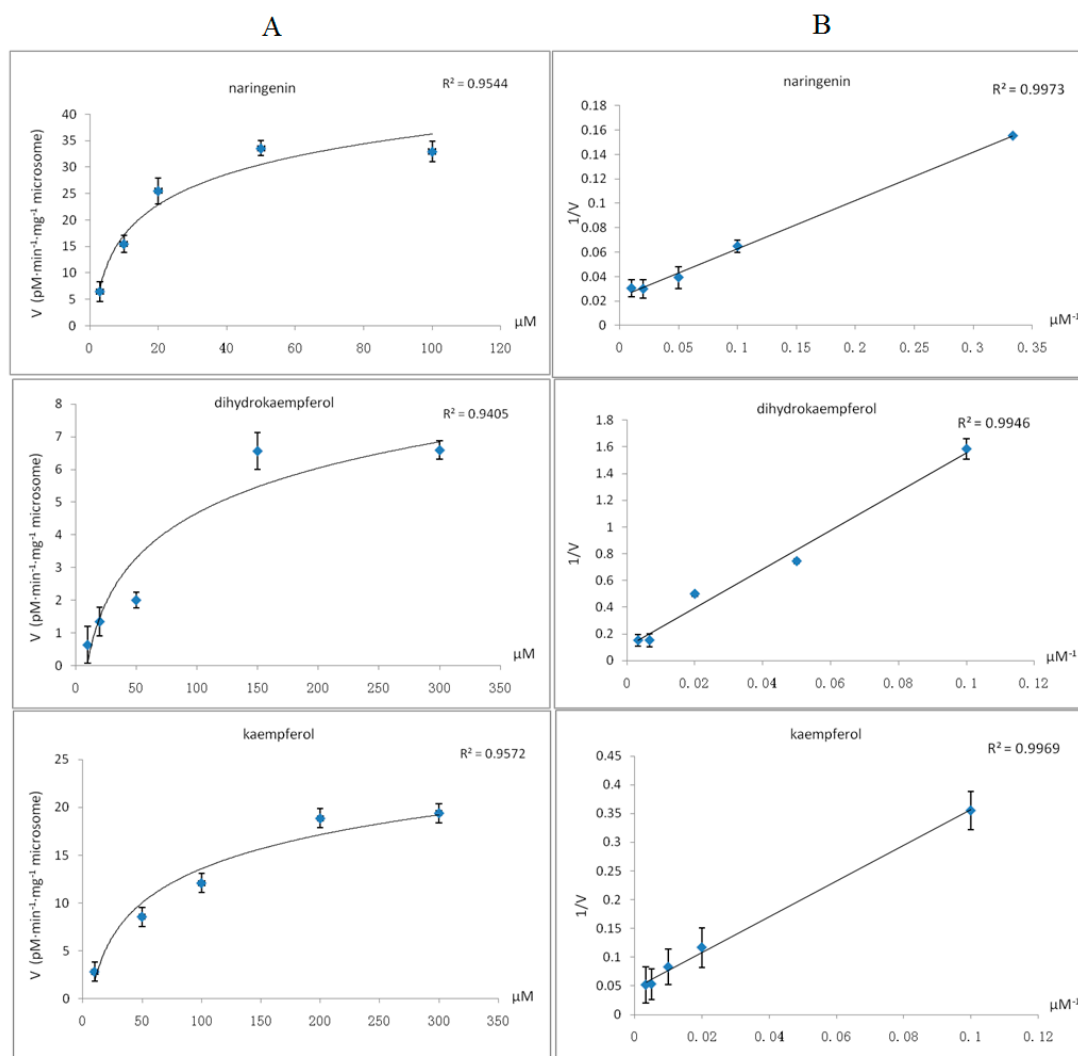

**Figure S1.** Concentration dependence of F3'H observed in yeast microsomes. F3'H-containing microsomes originating from transformed pYES-dest52-*CsF3'H* cells were incubated in 100 mM phosphate buffer pH 7.0 at 30 °C with naringenin, dihydrokaempferol and kaempferol as substrate respectively. (A) The result of a multi-iterative fitting of experimental data using the Michaelis-Menten equation; (B) Michaelis-Menten double-reciprocal plot. The data represent the mean  $\pm$  SD from three independent measurements.
